# Supplementary material
Source: PubMed Central journal article supplement (PMC5331264)

**Fig 1C**

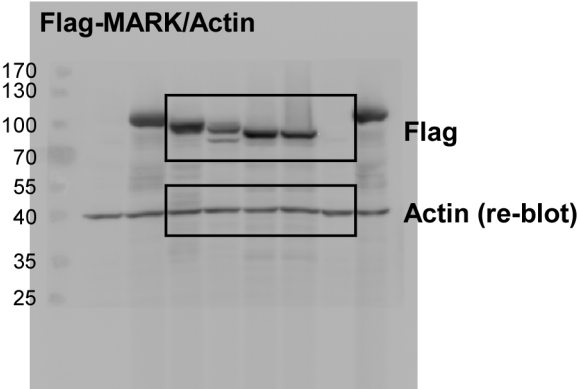

Supplement: EMBR-18-420-s003.pdf [file EMBR-18-420-s003.pdf]

**Fig 2C**

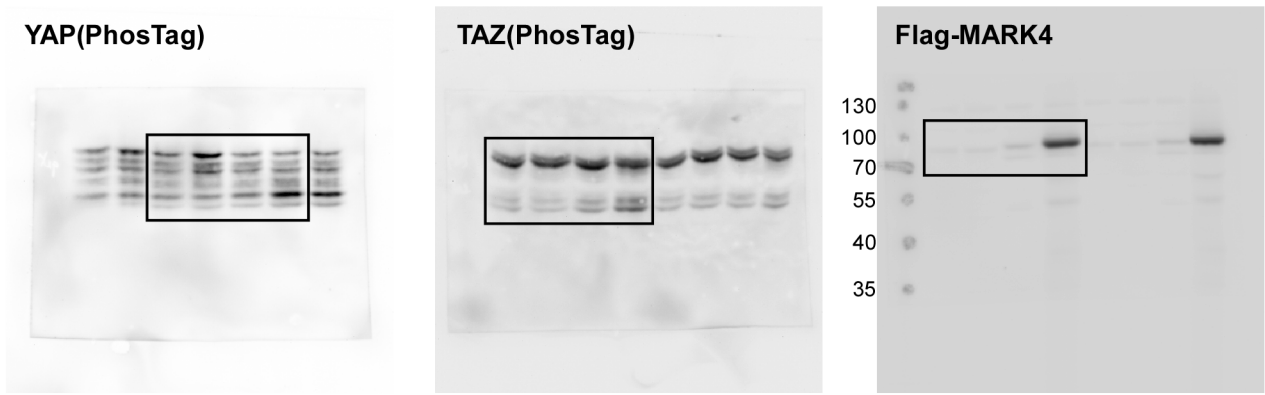

**Fig 2F**

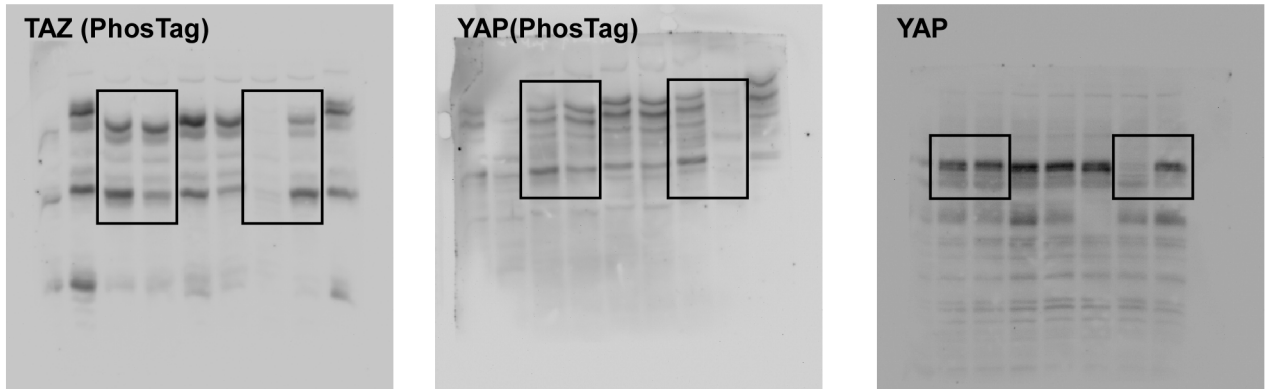

**Fig 2G**

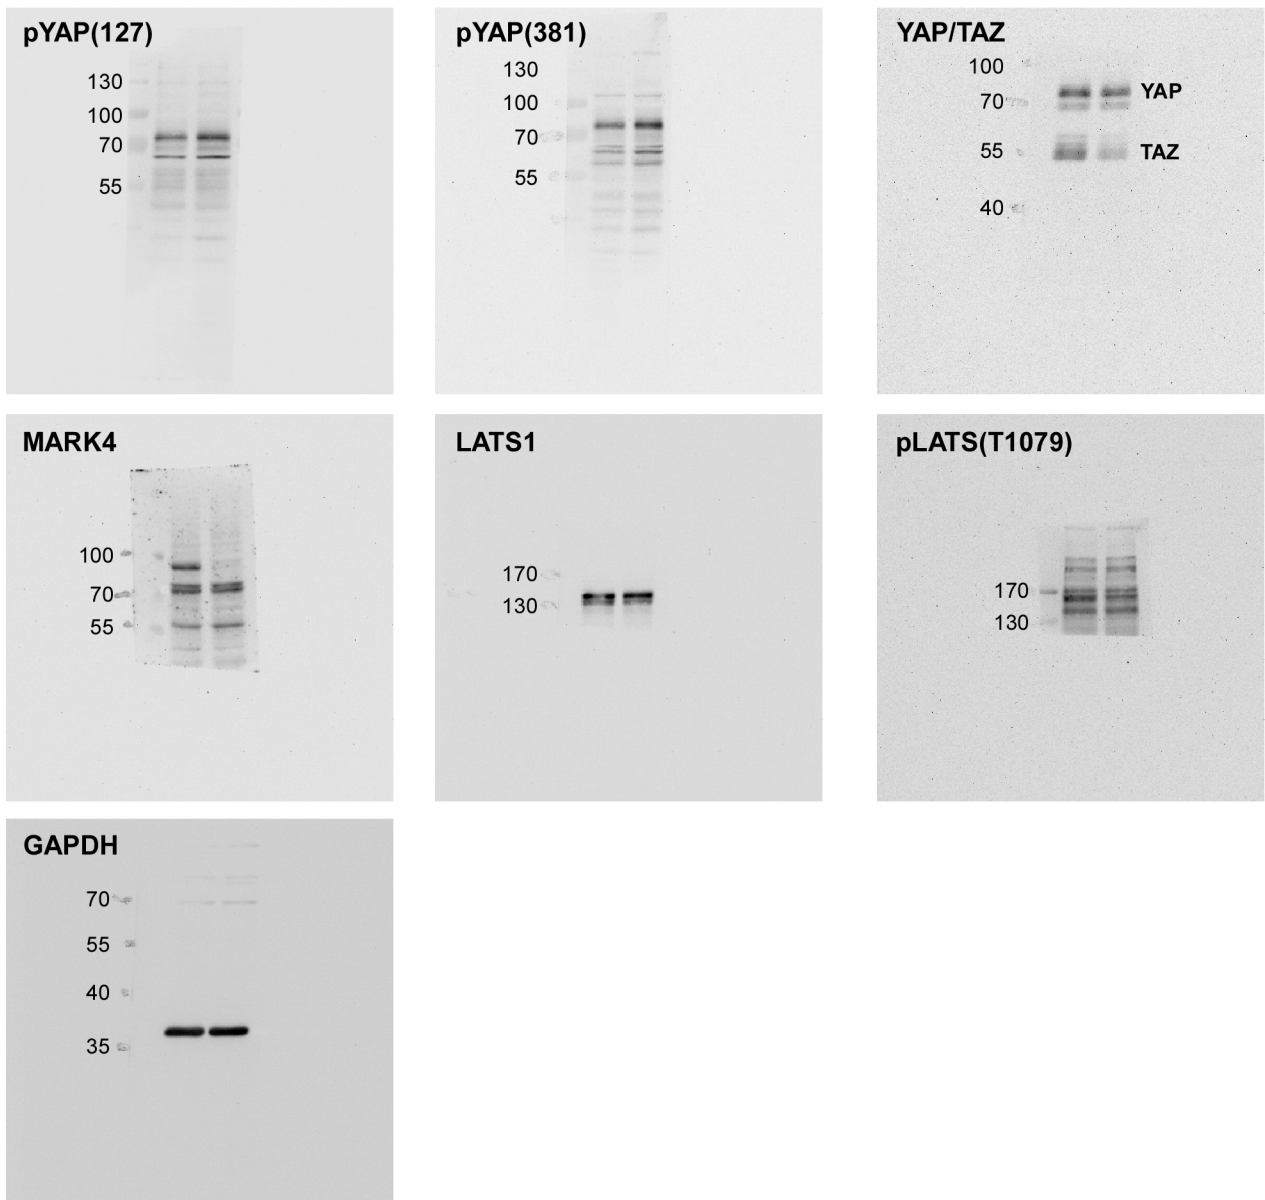

Supplement: EMBR-18-420-s004.pdf [file EMBR-18-420-s004.pdf]

**Fig 3B**

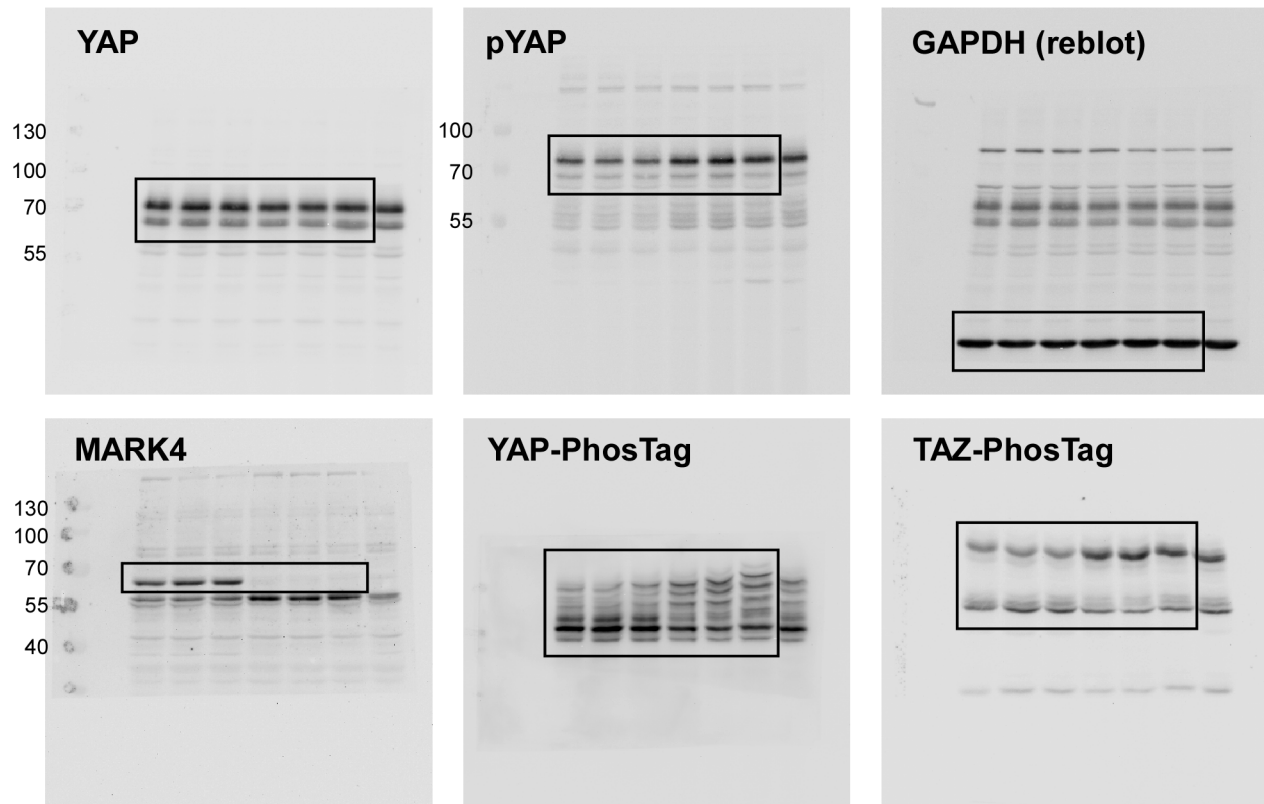

Supplement: EMBR-18-420-s005.pdf [file EMBR-18-420-s005.pdf]

**Fig 5B**

**IP**

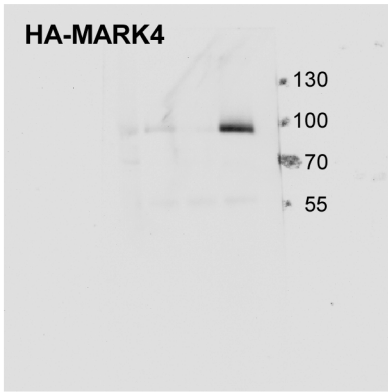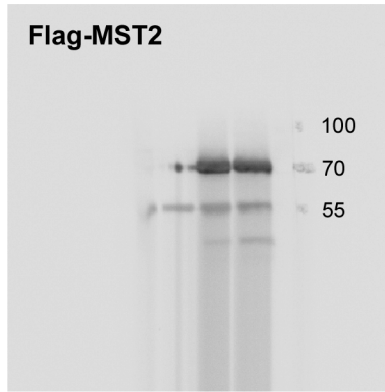

**Totals**

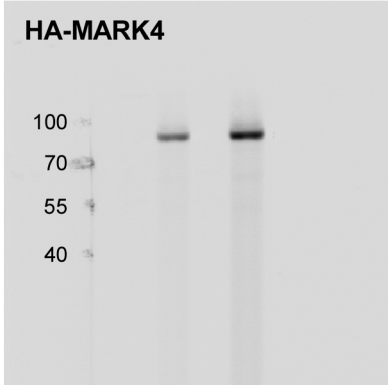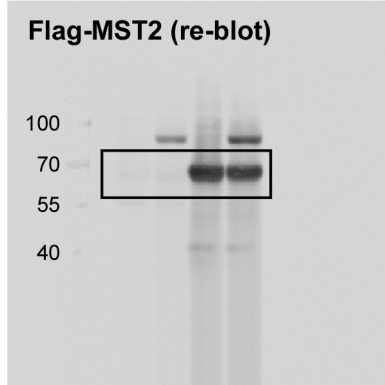

**Fig 5C**

**IP**

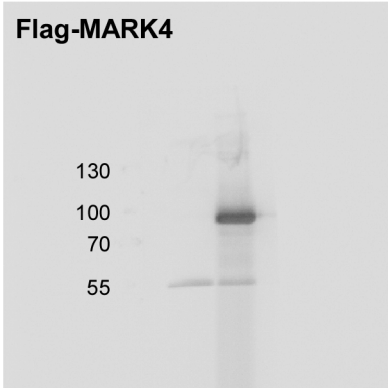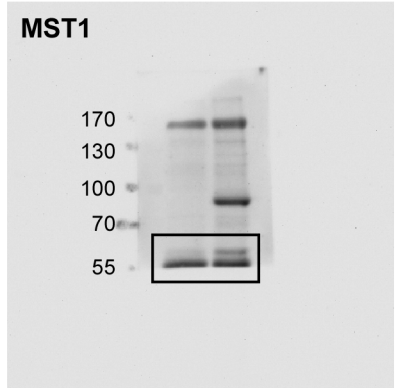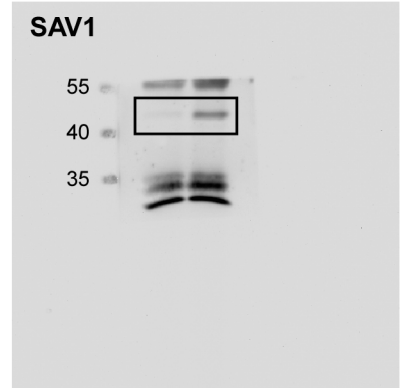

**Totals**

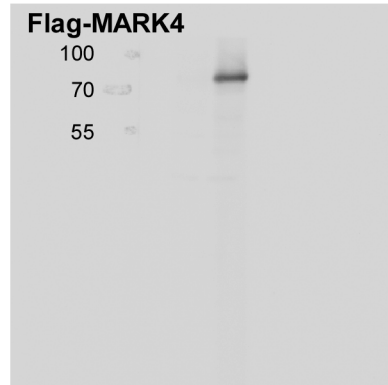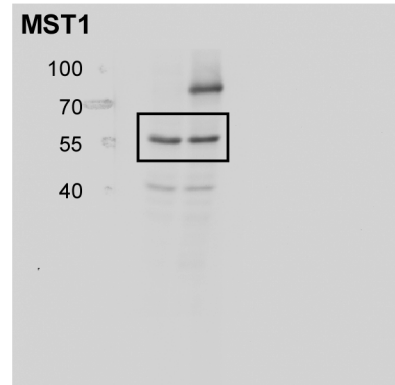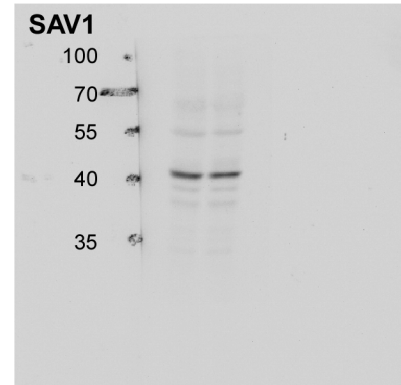

**Fig 5D**

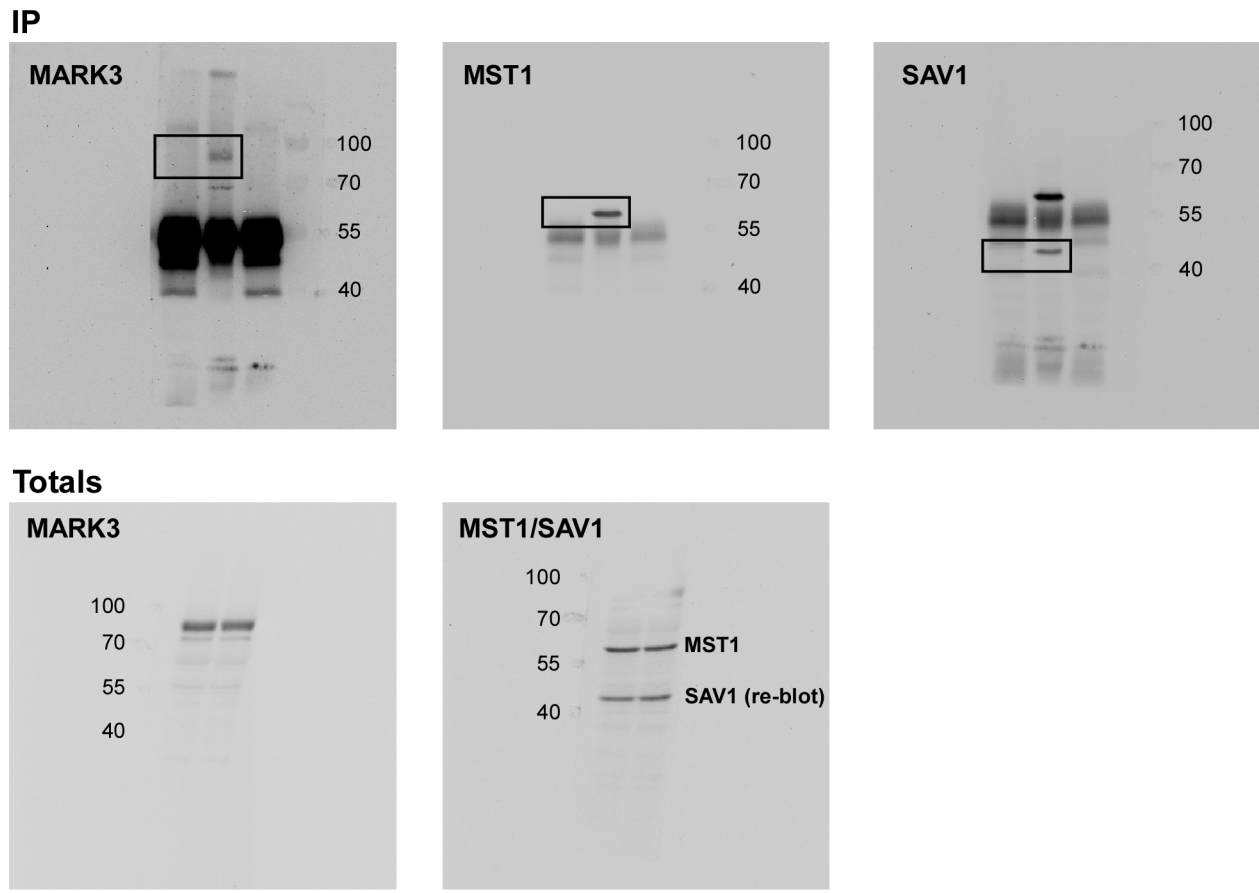

**Fig 5E**

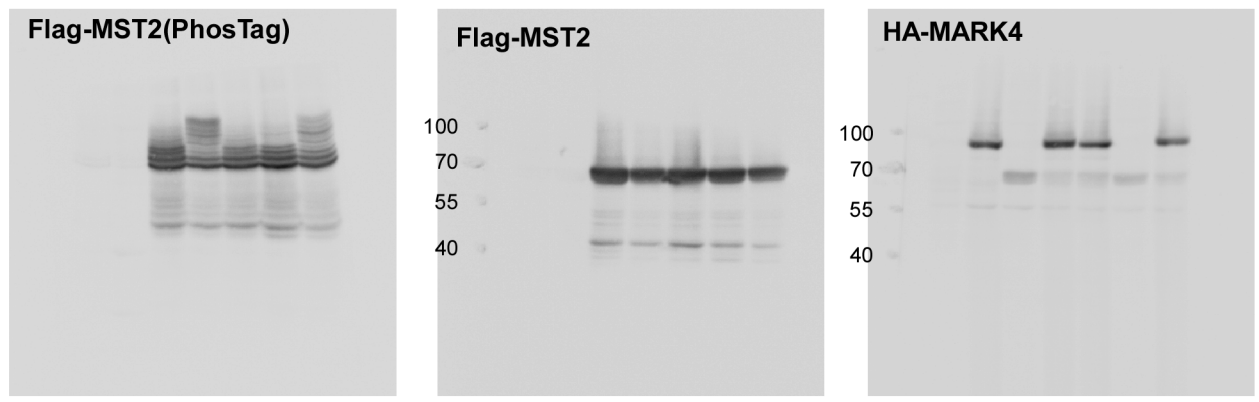

**Fig 5F**

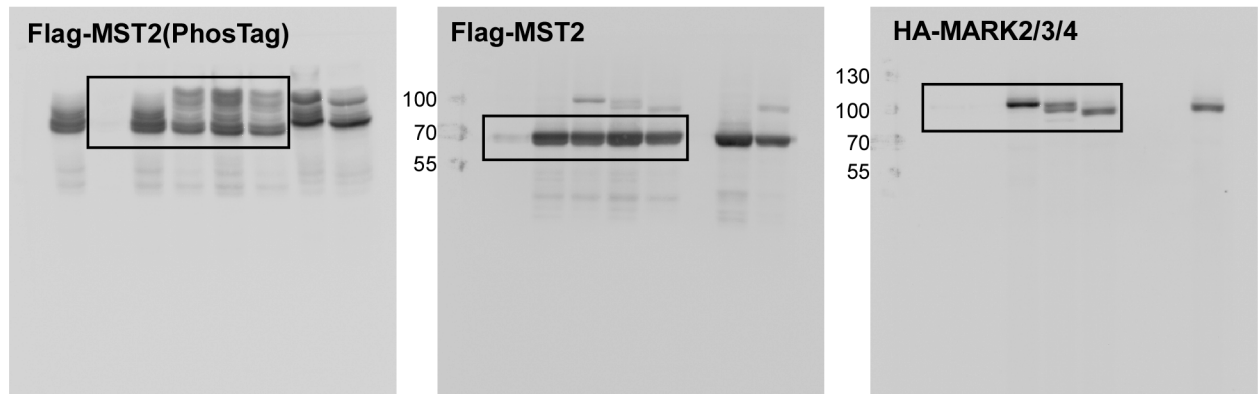

Supplement: EMBR-18-420-s006.pdf [file EMBR-18-420-s006.pdf]

**Fig 6A**

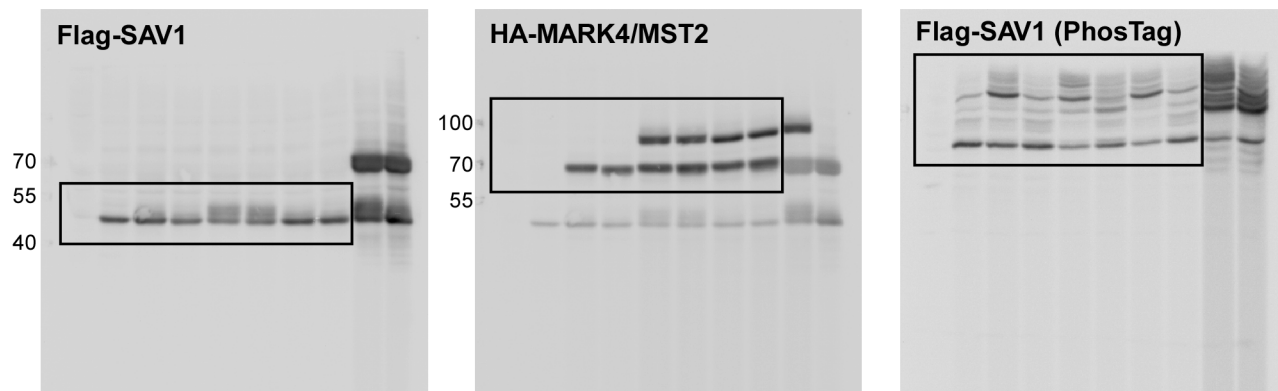

**Fig 6B**

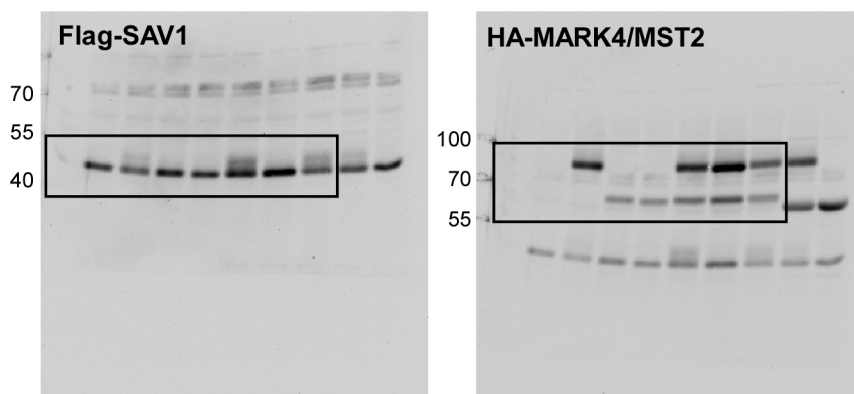

**Fig 6C**

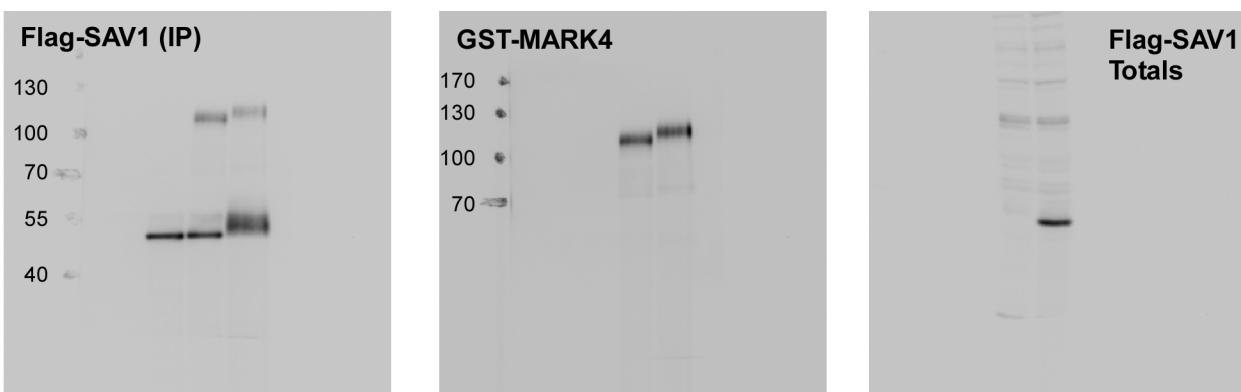

**Fig 6D**

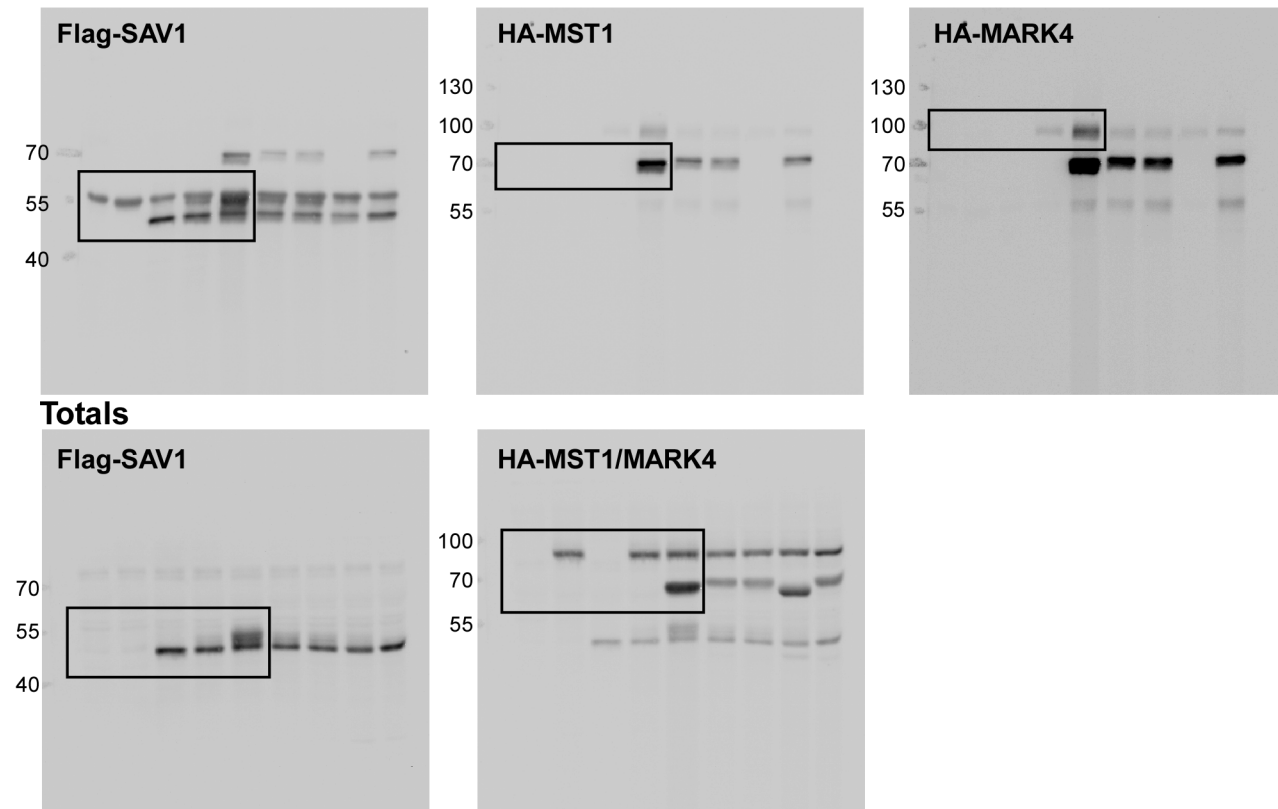

**Fig 6E** IP

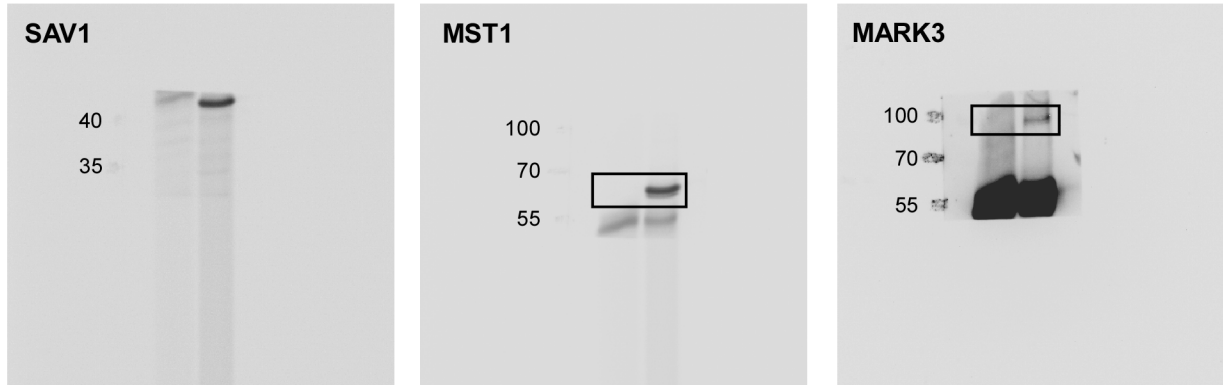

**Totals**

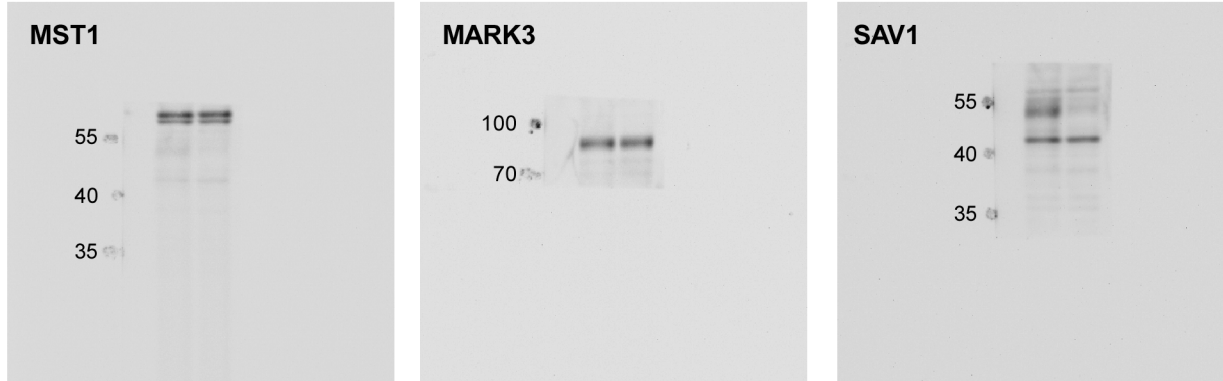

**Fig 6F** IP

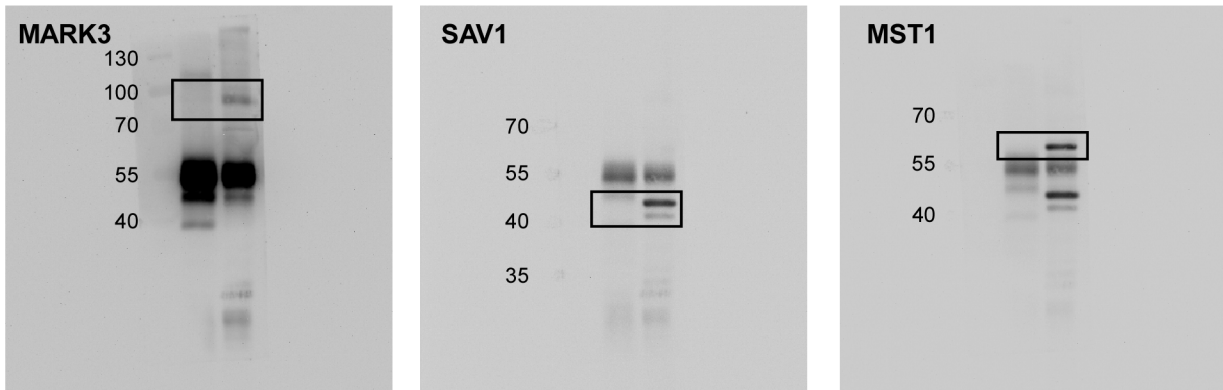

**Totals**

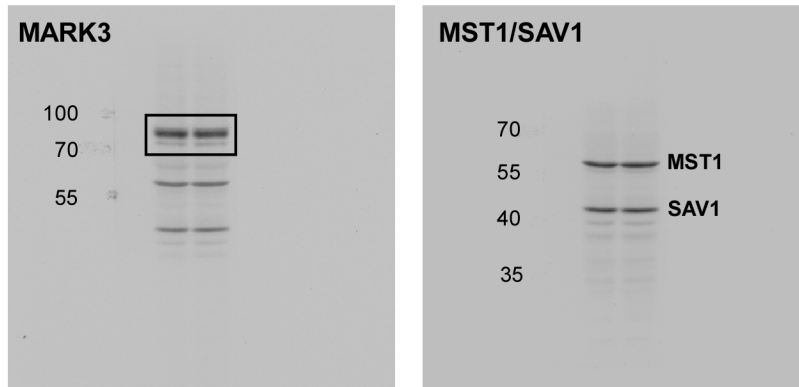

Supplement: EMBR-18-420-s007.pdf [file EMBR-18-420-s007.pdf]

**Fig 7A**

**IP**

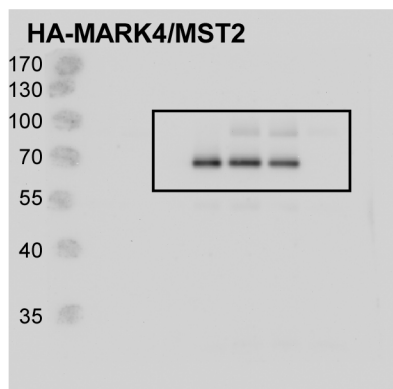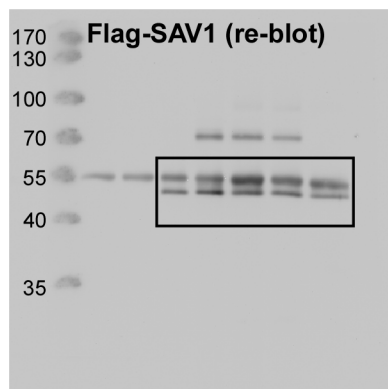

**Totals**

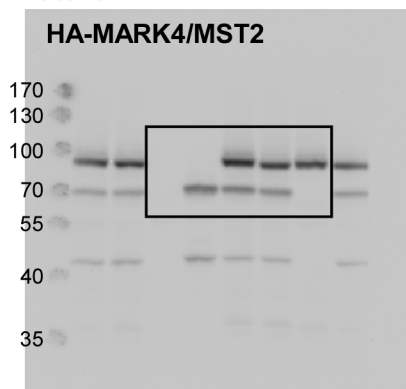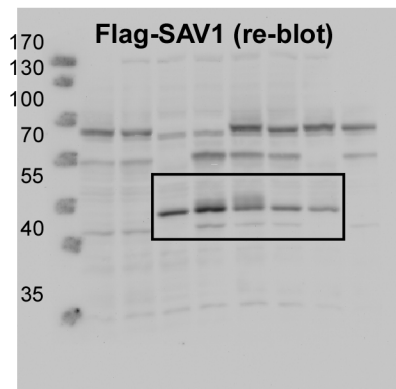

**Fig 7B**

**Totals**

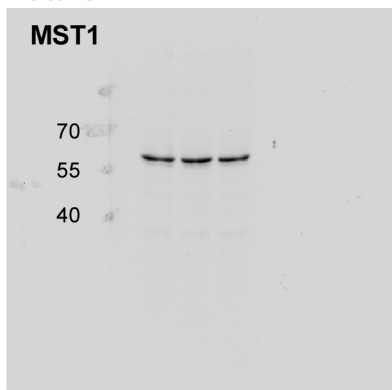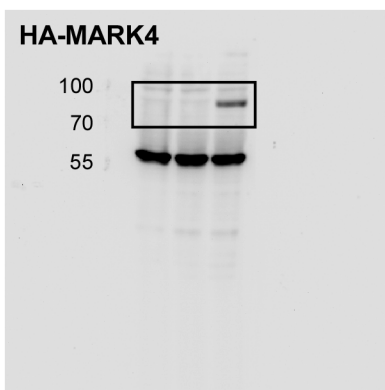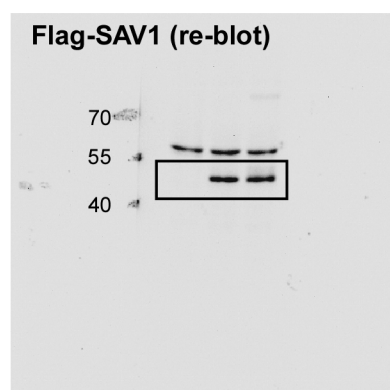

**IP**

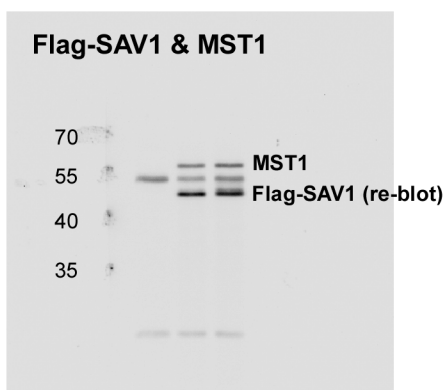

**Fig 7C**

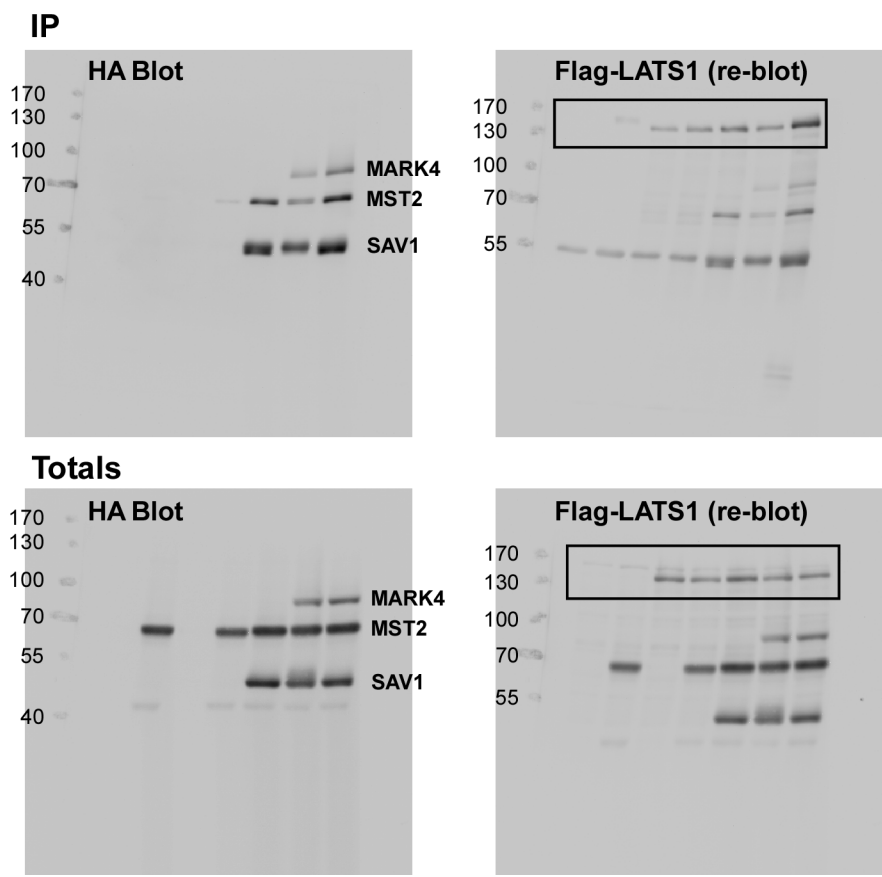

Supplement: EMBR-18-420-s008.pdf [file EMBR-18-420-s008.pdf]
